# Supplementary material for: Data Analysis of Step-Stress Accelerated Life Test with Random Group Effects under Weibull Distribution
Source: Hindawi journal article supplement (doi:10.1155/2020/4898123), 2020-02-05
Supplement: f1 [file 4898123.f1.docx]

## Supplementary Materials

A: an algorithm of data simulation for SSALT under Weibull-distribution assumption with random effect

1: PseudoDataNULL ⊿ matrix including columns of stress level, failure time, censoring indicator and group index

2: **for** *i* =1 to *M* **do**

3: draw a sample from *N*(0, );

4: **for** *k*=1 to 3 **do**

5: calculate , *j*=1,…,*ni* by Eq. (8);

6: **end for**

7:  **for** *j*=1 to *ni***do**

8: draw a sample *zij* from *Unif*(0,1);

9: obtain *tij* by the inverse of conditional CDF of SSALT(Eq. (A1));

10: **if** *tij*<*τ*1 **then**

11: append (*x*1*, tij,* 0*, i*)to pseudoData;

12:  **else if** *tij*<*τ*2 **then**

13: append (*x*2*, tij,* 0*, i*)to pseudoData;

14:  **else if** *tij*<*t*c **then**

15: append (*x*3*, tij,* 0*, i*)to pseudoData;

16:  **else**

17: append (*x*3*, tij,* 1*, i*)to pseudoData;

18: **end if**

19: **end for**

20: **end for**

=

B: simulated failure times of SSALT given *M*=5, *ni*=30 and *σu*=0.7

| group | stress | hours | group | stress | hours | group | stress | hours |
| --- | --- | --- | --- | --- | --- | --- | --- | --- |
| 1 | 7.1 | 12.48 | 2 | 7.9 | 684.00 | 4 | 7.9 | 644.84 |
| 1 | 7.1 | 18.15 | 2 | 7.9 | 689.52 | 4 | 7.9 | 646.49 |
| 1 | 7.1 | 28.87 | 2 | 7.9 | 708.84 | 4 | 7.9 | 670.35 |
| 1 | 7.1 | 33.93 | 2 | 7.9 | 734.87 | 4 | 7.9 | 676.07 |
| 1 | 7.1 | 36.06 | 2 | 7.9 | 740.84 | 4 | 7.9 | 677.20 |
| 1 | 7.1 | 98.63 | 2 | 7.9 | 741.30 | 4 | 7.9 | 679.06 |
| 1 | 7.1 | 114.85 | 2 | 7.9 | 759.15 | 4 | 7.9 | 751.61 |
| 1 | 7.1 | 129.95 | 2 | 7.9 | 790.66 | 4 | 7.9 | 753.09 |
| 1 | 7.1 | 257.63 | 2 | 7.9 | 865.99 | 4 | 7.9 | 787.52 |
| 1 | 7.1 | 325.03 | 2 | 7.9 | 893.58 | 4 | 7.9 | 801.15 |
| 1 | 7.1 | 447.09 | 3 | 7.1 | 2.90 | 4 | 7.9 | 810.12 |
| 1 | 7.1 | 526.65 | 3 | 7.1 | 12.85 | 4 | 7.9 | 818.07 |
| 1 | 7.9 | 604.15 | 3 | 7.1 | 130.58 | 4 | 8.7 | 884.06 |
| 1 | 7.9 | 604.25 | 3 | 7.1 | 250.93 | 4 | 8.7 | 900.29 |
| 1 | 7.9 | 610.32 | 3 | 7.1 | 288.16 | 4 | 8.7 | 904.72 |
| 1 | 7.9 | 615.58 | 3 | 7.1 | 512.66 | 4 | 8.7 | 908.46 |
| 1 | 7.9 | 625.84 | 3 | 7.9 | 601.54 | 4 | 8.7 | 909.06 |
| 1 | 7.9 | 633.09 | 3 | 7.9 | 602.62 | 4 | 8.7 | 910.88 |
| 1 | 7.9 | 634.97 | 3 | 7.9 | 603.56 | 4 | 8.7 | 918.82 |
| 1 | 7.9 | 637.34 | 3 | 7.9 | 605.15 | 4 | 7.1 | 918.96 |
| 1 | 7.9 | 641.31 | 3 | 7.9 | 615.45 | 5 | 7.1 | 1.90 |
| 1 | 7.9 | 651.74 | 3 | 7.9 | 622.78 | 5 | 7.1 | 5.93 |
| 1 | 7.9 | 652.25 | 3 | 7.9 | 628.78 | 5 | 7.1 | 6.67 |
| 1 | 7.9 | 654.71 | 3 | 7.9 | 634.05 | 5 | 7.1 | 17.16 |
| 1 | 7.9 | 661.86 | 3 | 7.9 | 635.25 | 5 | 7.1 | 20.45 |
| 1 | 7.9 | 664.33 | 3 | 7.9 | 640.47 | 5 | 7.1 | 20.80 |
| 1 | 7.9 | 664.77 | 3 | 7.9 | 653.02 | 5 | 7.1 | 62.03 |
| 1 | 7.9 | 667.22 | 3 | 7.9 | 655.52 | 5 | 7.1 | 65.83 |
| 1 | 7.9 | 762.32 | 3 | 7.9 | 659.93 | 5 | 7.1 | 69.92 |
| 1 | 7.1 | 843.69 | 3 | 7.9 | 667.46 | 5 | 7.1 | 72.17 |
| 2 | 7.1 | 0.19 | 3 | 7.9 | 672.56 | 5 | 7.1 | 155.66 |
| 2 | 7.1 | 58.36 | 3 | 7.9 | 684.87 | 5 | 7.1 | 208.28 |
| 2 | 7.1 | 58.49 | 3 | 7.9 | 689.04 | 5 | 7.1 | 237.33 |
| 2 | 7.1 | 228.58 | 3 | 7.9 | 702.28 | 5 | 7.1 | 269.67 |
| 2 | 7.9 | 515.26 | 3 | 7.9 | 716.05 | 5 | 7.1 | 270.09 |
| 2 | 7.9 | 607.83 | 3 | 7.9 | 719.82 | 5 | 7.1 | 280.92 |
| 2 | 7.9 | 609.19 | 3 | 7.9 | 720.47 | 5 | 7.1 | 391.93 |
| 2 | 7.9 | 611.22 | 3 | 7.9 | 750.54 | 5 | 7.1 | 481.84 |
| 2 | 7.9 | 612.17 | 3 | 7.9 | 779.47 | 5 | 7.1 | 513.22 |
| 2 | 7.9 | 626.10 | 3 | 7.9 | 791.87 | 5 | 7.1 | 550.04 |
| 2 | 7.9 | 635.07 | 4 | 7.1 | 199.37 | 5 | 7.1 | 572.29 |
| 2 | 7.9 | 638.29 | 4 | 7.1 | 258.71 | 5 | 7.9 | 607.21 |
| 2 | 7.9 | 642.62 | 4 | 7.1 | 295.94 | 5 | 7.9 | 619.07 |
| 2 | 7.9 | 643.43 | 4 | 7.9 | 607.30 | 5 | 7.9 | 621.69 |
| 2 | 7.9 | 645.39 | 4 | 7.9 | 609.98 | 5 | 7.9 | 625.29 |
| 2 | 7.9 | 647.76 | 4 | 7.9 | 618.21 | 5 | 7.9 | 626.01 |
| 2 | 7.9 | 654.04 | 4 | 7.9 | 627.81 | 5 | 7.9 | 644.93 |
| 2 | 7.9 | 658.35 | 4 | 7.9 | 631.06 | 5 | 7.9 | 669.17 |
| 2 | 7.9 | 673.57 | 4 | 7.9 | 633.08 | 5 | 7.9 | 670.54 |
| 2 | 7.9 | 679.90 | 4 | 7.9 | 637.07 | 5 | 7.9 | 709.13 |
